# Supplementary material
Source: HighWire-hosted journal article supplement (https://www.cmajopen.ca/highwire/filestream/81165/field_highwire_adjunct_files/1/2017-0104_original_submission.pdf)

1  
2  
3 **Changes in the dispensing of opioid medications in Canada following the introduction of a**  
4 **tamper-deterrent formulation of long-acting oxycodone**  
5  
6

7 Tara Gomes, MHSc  
8 Andrea Mastorakos, HBSc  
9 J. Michael Paterson MSc  
10 Ingrid Sketris Pharm.D., MPA(HSA)  
11 Patricia Caetano, PhD  
12 Simon Greaves MSc  
13 David Henry MB ChB, FRCP (edin)

14 *for the Canadian Network for Observational Drug Effect Studies (CNODES) Investigators\**  
15

16 **Affiliations:** Li Ka Shing Knowledge Institute of St. Michael's Hospital (TG), the Institute for  
17 Clinical Evaluative Sciences, Toronto, Ontario, Canada (TG, JMP, SG, DH); Institute of Health  
18 Policy, Management, and Evaluation (TG, JMP, DH), and the Leslie Dan Faculty of Pharmacy  
19 (TG) at the University of Toronto, Toronto, Ontario, Canada; Faculty of Arts and Sciences,  
20 University of Toronto, Toronto, Ontario, Canada (AM); Department of Family Medicine,  
21 McMaster University, Hamilton, Ontario, Canada (JMP); College of Pharmacy, Dalhousie  
22 University, Halifax (IS); University of Manitoba, Faculty of Health Sciences (PC), Provincial  
23 Drug Programs, Government of Manitoba (PC), Centre for Research in Evidence-based Practice,  
24 Bond University, Gold Coast, Australia (DH).  
25  
26

27 **Short Title: Patterns of Opioid Dispensing Across Canada**  
28

29 **Corresponding Author:**

30 Tara Gomes  
31 30 Bond St. Toronto, Ontario M5B 1W8  
32 GomesT@smh.ca  
33 [Phone: 416-864-6060 x77046](tel:416-864-6060)  
34  
35

36 **Abstract:** 249 words

37 **Manuscript:** 3,050 words

38 **Key Words:** Opioid analgesics, drug policy, pharmacoepidemiology  
39

40 \*The Canadian Network for Observational Drug Effect Studies (CNODES) Investigators are:  
41 Samy Suissa (Principal Investigator); Colin R. Dormuth (British Columbia); Brenda R.  
42 Hemmelgarn (Alberta); Gary F. Teare (Saskatchewan); Patricia Caetano and Dan Chateau  
43 (Manitoba); David A. Henry and J. Michael Paterson (Ontario); Jacques LeLorier (Québec);  
44 Adrian R. Levy (Atlantic: NS, NL, NB, PEI); Pierre Ernst and Kristian B. Fillion (UK Clinical  
45 Practice Research Datalink (CPRD)); Robert W. Platt (Methods); and Ingrid S. Sketris  
46 (Knowledge Translation). CNODES, a collaborating centre of the Drug Safety and Effectiveness  
47 Network (DSEN), is funded by the Canadian Institutes of Health Research (Grant Number DSE-  
48 146021).  
49

50 **Funding Source:** This study was supported by The Canadian Network for Observational Drug  
51 Effect Studies (CNODES), a collaborating centre of the Drug Safety and Effectiveness Network  
52 (DSEN), which is funded by the Canadian Institutes of Health Research (Grant Number DSE-  
53 146021). The opinions, results, and conclusions reported in this paper are those of the authors.  
54

55 **Competing Interests:** Tara Gomes has received unrestricted grant funding from the Ontario  
56 Ministry of Health and Long-Term Care. No other authors report any competing interests.  
57  
58  
59  
60

**ABSTRACT****BACKGROUND:**

In February 2012, a reformulated ‘tamper-deterrent’ form of long-acting oxycodone was introduced. We investigated trends in prescribing of opioid products in Canada, and the impact of the introduction of tamper-deterrent oxycodone on these patterns.

**METHODS:**

We conducted population-based, repeated cross-sectional analyses of dispensing of long-acting and immediate-release opioids in Canadian provinces between 2008 and 2016. We estimated monthly community pharmacy dispensing of oral and transdermal codeine, morphine, hydromorphone, oxycodone, and fentanyl, and converted quantities to mg morphine equivalents (MME) per 1000 population. We used time series analysis to evaluate the impact of tamper-deterrent oxycodone on these trends.

**RESULTS:**

After the introduction of tamper-deterrent oxycodone, national dispensing of long-acting opioids fell 14.9% from 36,098 MME to 30,716 MME per 1000 population in April 2016 ( $p < 0.01$ ). These effects varied and were largest in Ontario (23% reduction;  $p = 0.01$ ) and British Columbia (30% reduction;  $p = 0.01$ ). The national dispensing rate of oxycodone fell 39% after the introduction of a tamper-deterrent formulation ( $p < 0.001$ ), which was partially offset by a 48% rise in dispensing of hydromorphone ( $p < 0.001$ ). Although dispensing of immediate release opioids was a significant contributor to overall population opioid exposure across Canada, it was unaffected by the introduction of

1  
2  
3 tamper-deterrent oxycodone ( $p>0.05$  in all provinces).  
4  
5

6  
7 **INTERPRETATION:**  
8

9  
10 The introduction of tamper-deterrent oxycodone led to modest reductions in overall  
11 dispensing of long-acting opioids in some Canadian provinces. These changes were  
12 overshadowed by major differences in product choice and levels of opioid dispensing  
13 between provinces, underscoring the importance of regional pharmaceutical coverage and  
14 clinical practice policies.  
15  
16  
17  
18  
19  
20  
21  
22  
23  
24  
25  
26  
27  
28  
29  
30  
31  
32  
33  
34  
35  
36  
37  
38  
39  
40  
41  
42  
43  
44  
45  
46  
47  
48  
49  
50  
51  
52  
53  
54  
55  
56  
57  
58  
59  
60

Confidential

## INTRODUCTION

Opioids are a class of analgesics generally recognized as being the optimum treatment for moderate to severe pain associated with cancer.<sup>1,2</sup> In the early 1990s, there was a critical shift in practice to include opioids in the treatment of chronic non-cancer pain, which has driven an increase in the prescribing and consumption of opioids over the last 20 years.<sup>3-5</sup> Prescribing opioids in chronic non-cancer pain remains controversial, as their long-term use has been associated with significant side effects, which include abuse, addiction and premature death from accidental overdose.<sup>6,7</sup>

Canada and the United States have the highest levels of prescription opioid consumption per capita<sup>8</sup>, with rates that are approximately double those observed in the European Union, Australia and New Zealand.<sup>9</sup> In Canada, prescription opioid consumption increased nearly four-fold between 1999 and 2010<sup>10</sup>, despite the proportion of Canadians who reported suffering from chronic pain not changing significantly over this period.<sup>11</sup> In Ontario, the rate of opioid prescribing rose by 29% from 1991 to 2007, which was largely driven by an 850% rise in prescribing of oxycodone.<sup>12</sup> This rising prevalence of oxycodone prescribing in Ontario has been associated with the addition of long-acting oxycodone (OxyContin<sup>®</sup>) to the provincial drug benefit formulary in 2000, raising serious concerns regarding its potential misuse and abuse.<sup>12</sup> In particular, the ability to circumvent the long-acting properties of the oxycodone tablet by chewing or grinding the pills for inhalation or injection has been widely criticized as a contributing factor to rising rates of opioid addiction and overdose across North America.<sup>13,14</sup> In February 2012, the manufacturer of OxyContin<sup>®</sup> discontinued its production and replaced it with a tamper-deterrent formulation, OxyNeo<sup>®</sup>, that was designed to be more difficult

1  
2  
3 to misuse. The response of the Canadian public drug insurance plans to the new  
4  
5 formulation varied, with provinces such as Alberta granting OxyNeo<sup>®</sup> the same full  
6  
7 benefit status afforded to OxyContin<sup>®</sup>, while others severely restricted access.<sup>15</sup>  
8  
9

10 Given that OxyNeo<sup>®</sup> was the first opioid with tamper-deterrent properties in  
11  
12 Canada, and because opioid prescribing practices vary widely across Canada<sup>16</sup>, the  
13  
14 Canadian Network for Observational Drug Effect Studies (CNODES) explored the  
15  
16 impact of the introduction of OxyNeo<sup>®</sup> on opioid prescribing patterns across the country.  
17  
18  
19

## 20 21 22 **METHODS** 23

24 We conducted a population-based, repeated cross-sectional analysis of long-  
25  
26 acting opioid prescribing across Canada between May 1, 2008 and April 30, 2016. We  
27  
28 studied dispensing of oral or transdermal formulations of codeine, morphine,  
29  
30 hydromorphone, oxycodone, and fentanyl. Propoxyphene and meperidine were excluded  
31  
32 due to their limited prescribing during the study period, and methadone and  
33  
34 buprenorphine were excluded as they are used primarily to treat addiction in Canada.  
35  
36  
37  
38

39 We used the QuintileIMS CompuScript database to identify monthly retail  
40  
41 pharmacy prescription quantities for all eligible opioid analgesics dispensed during the  
42  
43 study period. This database captures data from a representative sample of approximately  
44  
45 6,000 community pharmacies and projects prescription quantities dispensed at the  
46  
47 national and provincial level. These projections incorporate information about the  
48  
49 number of pharmacies in each region, the distance between participating pharmacies and  
50  
51 the size of the pharmacies. Projections are conducted at the level of drug identification  
52  
53 number (DIN), thus allowing the estimate of prescription quantities by opioid medication  
54  
55  
56  
57  
58  
59  
60

1  
2  
3 and strength. These data are continuously monitored and verified by QuintilesIMS to  
4 ensure that they are within the standards set for quality control, they are representative at  
5  
6 both the provincial and national level, and are regularly used for research purposes.<sup>16,17</sup>  
7  
8  
9

10  
11 We captured the number of units (i.e. tablets or transdermal patches) dispensed of  
12 each opioid by month and strength. The total quantity of opioid dispensed each month  
13 was calculated by multiplying the units by the formulation strength and expressed in  
14 milligrams of morphine equivalents (MME) using conversion ratios reported in the  
15  
16 Canadian National Opioid Use Guideline Group.<sup>18</sup> Our primary measures of interest were  
17 the rate of long-acting opioid dispensing by province, and the national rate of long-acting  
18 opioid dispensing stratified by opioid type. In a secondary analysis, we analyzed trends in  
19 immediate-release opioid dispensing by province, and long-acting opioid prescribing by  
20  
21 opioid type for each province separately. Dispensing rates were reported as MME  
22  
23 dispensed per 1000 population, using Statistics Canada census population estimates as the  
24  
25 denominator.  
26  
27  
28  
29  
30  
31  
32  
33  
34  
35  
36  
37

38 Patterns of long-acting opioid dispensing were compared in the first (May to  
39 October 2008) and last (November 2015 to April 2016) 6-month-periods of the study by  
40 province to establish any changes that occurred over our study period. Measures  
41 captured at each observation point included opioid prescription rate, average number of  
42  
43 opioid units dispensed per prescription and opioid quantity (in MME) dispensed per  
44  
45 prescription. We calculated ratios of the prescription rate and quantity dispensed as a  
46  
47  
48  
49  
50  
51  
52  
53  
54  
55  
56  
57  
58  
59  
60

### *Statistical Analysis*

1  
2  
3 We used time series analysis to characterize the impact of the introduction of  
4  
5  
6  
7  
8  
9  
10  
11  
12  
13  
14  
15  
16  
17  
18  
19  
20  
21  
22  
23  
24  
25  
26  
27  
28  
29  
30  
31  
32  
33  
34  
35  
36  
37  
38  
39  
40  
41  
42  
43  
44  
45  
46  
47  
48  
49  
50  
51  
52  
53  
54  
55  
56  
57  
58  
59  
60

We used time series analysis to characterize the impact of the introduction of tamper-deterrent long-acting oxycodone to the drug formulary in February 2012 on the rate of long-acting and immediate-release opioid dispensing in Canada using a ramp function in interventional autoregressive integrated moving average (ARIMA) models. All models were fitted using data from the beginning of our study period to April 2013. We excluded data after this to avoid modeling more remote shifts in prescribing that we believed were unlikely to be immediately related to the introduction of OxyNeo®. Model fit was examined using white noise probabilities, autocorrelation functions and the Ljung-Box test. All analyses used a type 1 error rate of 0.05 as the threshold for statistical significance and were carried out using SAS statistical software (v 9.3; SAS Institute, Cary, NC).

## RESULTS

Over the eight-year study period, a total of 1,739,057,621 tablets and transdermal patches for long-acting opioids were dispensed in Canada. The quantity dispensed differed by opioid type, with oxycodone tablets accounting for 42% (726,477,071), hydromorphone for 26% (443,604,461), morphine for 23% (408,648,392), codeine for 6% (99,856,627), and fentanyl patches for 3% (60,471,070) of all long-acting opioid units dispensed. In addition, 7,350,703,901 tablets for immediate-release opioids were dispensed in Canada.

Overall usage varied substantially by province (Figure 1). Ontario exhibited the highest levels of opioid dispensing throughout the 8 years of the study and Quebec consistently had the lowest levels, which were generally less than half of those seen in

1  
2  
3 Ontario. Dispensing levels fell in several provinces in the last 12 months of the study,  
4  
5 with British Columbia's (B.C.'s) rate falling below that of Quebec in February 2015.  
6  
7

8       Upon the introduction of tamper-deterrent long-acting oxycodone in February  
9  
10 2012, the monthly quantity of long-acting opioid dispensing fell 14.9% from 36,098  
11  
12 MME per 1000 population to 30,716 MME per 1000 population in April 2016 ( $p<0.01$ ).  
13  
14 However, this impact varied across Canada. In Ontario and B.C., introduction of tamper-  
15  
16 deterrent long-acting oxycodone was associated with significant reductions in the overall  
17  
18 quantity of long-acting opioids dispensed, with rates falling by 23% (from 50,865 MME  
19  
20 to 39,288 MME per 1000 population;  $p=0.01$ ) and 30% (from 27,306 MME to 19,107  
21  
22 MME per 1000 population;  $p=0.01$ ), respectively. The introduction of OxyNeo® also  
23  
24 was associated with significant changes in the rate of long-acting opioid prescribing in  
25  
26 Saskatchewan ( $p=0.01$ ), Quebec ( $p<0.01$ ) and New Brunswick ( $p=0.05$ ); however, these  
27  
28 latter impacts were small and temporary, and overall rates of long-acting opioid use  
29  
30 continued to rise in these provinces over the study period. In contrast, the introduction  
31  
32 of OxyNeo® had no impact on rates of immediate-release dispensing (Figure 2;  $p>0.05$   
33  
34 in all models), with rates climbing in most provinces. Although the rate of immediate-  
35  
36 release opioid dispensing declined over time in Nova Scotia and B.C., the introduction of  
37  
38 OxyNeo® did not appear to be driving these changes ( $p=0.42$  and  $0.85$ , respectively).  
39  
40  
41  
42  
43  
44  
45

46       Despite overall reductions in national rates of long-acting opioid dispensing,  
47  
48 changes in the quantity of opioid dispensed varied considerably by opioid type. The  
49  
50 national rate of long-acting oxycodone prescribing fell by 39% after the introduction of  
51  
52 OxyNeo®, from 14,140 MME per 1000 (February 2012) to 7,585 MME per 1000 at the  
53  
54 end of our study period ( $p<0.001$ ; Figure 3). In contrast, the rate of hydromorphone  
55  
56  
57  
58  
59  
60



1  
2  
3 dispensing climbed 48% from 4,890 MME to 7,227 MME per 1000 population between  
4  
5 February 2012 and the end of our study period ( $p < 0.001$ ), indicating a likely partial  
6  
7 substitution for oxycodone. We observed no impact of the new oxycodone formulation  
8  
9 on the dispensed quantities of long-acting morphine ( $p = 0.09$ ), codeine ( $p = 0.73$ ) or  
10  
11 fentanyl ( $p = 0.70$ ). By the last month of our study period, fentanyl made the largest single  
12  
13 contribution to overall community opioid exposure (37%; 11,510 MME per 1000  
14  
15 population), followed by oxycodone (25%; 7,585 MME per 1000 population),  
16  
17 hydromorphone (24%; 7,227 MME per 1000 population), morphine (13%; 4,011 MME  
18  
19 per 1000 population), and codeine (1%; 383 MME per 1000 population). This high value  
20  
21 for MME for fentanyl contrasts with the low numbers of dispensed units noted earlier due  
22  
23 to the high potency of this drug, and the use of patches over a three-day period.  
24  
25  
26  
27  
28

29  
30 In the first 6 months of our study period (May to October 2008), the number of  
31  
32 units and the quantity (in MME) dispensed per prescription varied considerably between  
33  
34 provinces (Table 1). In Quebec, the average number of units dispensed per prescription  
35  
36 was 32, with each prescription having 2,153 MME opioid on average. In contrast, in all  
37  
38 other provinces across Canada, the average number of opioid units dispensed per  
39  
40 prescription ranged from 53 (B.C.) to 74 (Nova Scotia) and the average opioid quantity  
41  
42 per prescription varied from 3,162 MME (B.C.) to a high of 4,508 MME (Ontario).  
43  
44 Although the rate of long-acting opioid prescribing (prescriptions/1000 population)  
45  
46 increased over the study period, the number of units and total quantity (in MME)  
47  
48 dispensed per prescription declined. The largest changes in prescription quantity were  
49  
50 observed in Ontario, Quebec, B.C. and Nova Scotia where the opioid quantity dispensed  
51  
52 per prescription fell by between 43.9% (Nova Scotia) and 47.5% (Quebec). In the last 6  
53  
54  
55  
56  
57  
58  
59  
60

1  
2  
3 months of the study period, Quebec continued to exhibit the lowest quantity of opioids  
4 dispensed per prescription (25 units per prescription; 1,131 MME per prescription).  
5  
6

7  
8 Before the introduction of OxyNeo® in February 2012, oxycodone accounted for  
9 the highest levels of population exposure to long-acting opioids (expressed as MME/1000  
10 population) in all provinces, except for Manitoba, Saskatchewan, and Quebec where  
11 fentanyl dominated, and Nova Scotia where hydromorphone dominated (see  
12 Supplementary Appendix). In provinces where oxycodone accounted for the greatest  
13 opioid exposure, the introduction of OxyNeo® led to a reduction in oxycodone quantity  
14 dispensed. However, the extent of the decline varied. In Alberta, despite a rapid decline  
15 in dispensing, oxycodone remained dominant at the end of our study period. In contrast,  
16 in Ontario, B.C., and Prince Edward Island, declines in oxycodone exposure led to  
17 fentanyl becoming the dominant opioid (in terms of MME/1000 population); and in New  
18 Brunswick, hydromorphone became the dominant opioid.  
19  
20  
21  
22  
23  
24  
25  
26  
27  
28  
29  
30  
31  
32  
33  
34

### 35 **DISCUSSION:**

36  
37 In this population based study spanning 8 years, we found that the introduction of  
38 OxyNeo®, together with associated changes in public drug benefit policy in some  
39 provinces, led to significant reductions in the quantity of long-acting opioids dispensed in  
40 Canada, with long-acting oxycodone dispensing falling dramatically and being partially  
41 replaced by increased dispensing of long-acting hydromorphone. Furthermore, we  
42 observed a small, but significant reduction in the overall quantity of long-acting opioids  
43 dispensed in Canada, and no corresponding increase in immediate-release opioid  
44 dispensing suggesting that declining oxycodone dispensing outweighed increased rates of  
45 dispensing of other long-acting opioids.  
46  
47  
48  
49  
50  
51  
52  
53  
54  
55  
56  
57  
58  
59  
60

1  
2  
3  
4  
5  
6  
7  
8  
9  
10  
11  
12  
13  
14  
15  
16  
17  
18  
19  
20  
21  
22  
23  
24  
25  
26  
27  
28  
29  
30  
31  
32  
33  
34  
35  
36  
37  
38  
39  
40  
41  
42  
43  
44  
45  
46  
47  
48  
49  
50  
51  
52  
53  
54  
55  
56  
57  
58  
59  
60

These findings suggest that the introduction of one tamper-deterrent agent will drive dispensing patterns towards other similar opioids within the same class that do not have tamper-deterrent properties. Recently, two large studies from the U.S. also reported significant reductions in the quantity of long-acting oxycodone dispensed following the introduction of a tamper-deterrent formulation. However, in contrast to our findings, they reported no corresponding rise in the quantity of other long-acting opioids dispensed.<sup>19,20</sup> These differences may be at least partially explained by changes in the public funding of long-acting oxycodone in Canada after the introduction of the tamper-deterrent formulation, which may have led more patients to switch from oxycodone to an alternative opioid. The rate of long-acting oxycodone dispensing fell by 39% in Canada, compared to approximately 29% in the U.S.<sup>20</sup> Furthermore, a U.S. study among patients with opioid dependence reported a dramatic reduction in use of OxyContin as a primary drug of abuse following the introduction of tamper-deterrent oxycodone, followed by a significant rise in the abuse of other opioids such as fentanyl, hydromorphone, and heroin.<sup>21</sup> This suggests that among people dependent on opioids in the U.S., the abuse-deterrent formulation of oxycodone was likely replaced with alternative opioids, both prescription and illicit.<sup>21</sup>

We observed considerable inter-provincial variation in the impact of introducing tamper-deterrent long-acting oxycodone which likely reflects both differences in patterns of opioid prescribing prior to this change and differences in provincial drug insurance plan policies. In particular, the national trend towards lower dispensing quantity of long-acting opioids was driven by two of the largest provinces in Canada – Ontario and B.C. In both provinces, there were immediate, dramatic reductions in dispensing of long-

1  
2  
3 acting oxycodone such that by June 2012, only 5 months after the introduction of tamper-  
4  
5  
6  
7  
8  
9  
10  
11  
12  
13  
14  
15  
16  
17  
18  
19  
20  
21  
22  
23  
24  
25  
26  
27  
28  
29  
30  
31  
32  
33  
34  
35  
36  
37  
38  
39  
40  
41  
42  
43  
44  
45  
46  
47  
48  
49  
50  
51  
52  
53  
54  
55  
56  
57  
58  
59  
60

acting oxycodone such that by June 2012, only 5 months after the introduction of tamper-deterrent long-acting oxycodone, oxycodone was no longer the dominant opioid in either province. This was likely driven, at least in part, by strict reimbursement criteria implemented in both provinces.<sup>22,23</sup> Although patients could continue to access this drug through private drug insurance and cash payment, listing status on public drug formularies often drives broader prescribing patterns. While we observed similar patterns of reduced long-acting oxycodone dispensing in other provinces, the impact on overall opioid quantity dispensed outside of Ontario and B.C. was minimal. In most provinces, this is because long-acting oxycodone dispensing was low, even prior to the introduction of the tamper-deterrent formulation, and therefore small shifts away from oxycodone had limited impact on the total quantity of long-acting opioid dispensed. Two exceptions to this were New Brunswick and Alberta. In New Brunswick, long-acting oxycodone dispensing was high, but was significantly impacted by the new formulation and strict reimbursement restrictions for this new product on the provincial drug insurance plan.<sup>15</sup> Conversely, in Alberta, long-acting oxycodone dispensing was high, and despite a small drop in quantity in February 2012, it remained this way throughout the study period. This may be due to the listing of tamper-deterrent long-acting oxycodone as a full benefit in Alberta, leading to minimal requirements for clinicians to shift patients to alternative opioids.<sup>15</sup>

These findings highlight the complex impacts that can occur with the introduction of new tamper-deterrent agents in a medication class where other, non-tamper-deterrent options continue to exist. It appears that the combination of a tamper-deterrent agent, along with accompanying changes to listing status on public drug insurance programs in

1  
2  
3 several provinces led to both significant replacement of oxycodone with other long-acting  
4  
5  
6  
7  
8  
9  
10  
11  
12  
13  
14  
15  
16  
17  
18  
19  
20  
21  
22  
23  
24  
25  
26  
27  
28  
29  
30  
31  
32  
33  
34  
35  
36  
37  
38  
39  
40  
41  
42  
43  
44  
45  
46  
47  
48  
49  
50  
51  
52  
53  
54  
55  
56  
57  
58  
59  
60

several provinces led to both significant replacement of oxycodone with other long-acting opioids, and an overall reduction in the quantity of long-acting opioids dispensed, nationally. In the U.S., similar changes in opioid prescribing patterns following the introduction of tamper-deterrent oxycodone have been associated with increased reports of using heroin to get high<sup>24</sup>, and accelerated rates of heroin overdoses.<sup>19</sup> Although the impact of this new formulation on patient outcomes in Canada has not been studied, recent reports have found that hospitalizations for heroin overdoses rose by 38% between fiscal years 2011/12 and 2012/13 in Canada and that heroin involvement in opioid-related deaths nearly doubled between 2012 and 2015 in Ontario.<sup>25,26</sup> Despite our inability to determine the extent to which this was driven by changes in long-acting opioid dispensing patterns, this highlights a need for further exploration of the potential consequences of these shifts on patient outcomes.

Aside from the influence of tamper-deterrent oxycodone, our study highlights important differences between provinces in the utilization of long-acting opioids. Dispensing levels remained higher in Ontario than in other provinces throughout the study, although the gap closed markedly with the fall in oxycodone use after 2012. Quebec had the lowest levels of use until the end of the study when it was surpassed by British Columbia. Examination of prescription characteristics suggested that the fall in population exposures was achieved by reduced quantities of opioid per prescription rather than a reduction in the numbers of prescriptions written. This is particularly notable in Quebec, where it is common practice to issue a prescription for about half the number of days as in other provinces.<sup>27</sup>

### *Strengths and Limitations*

1  
2  
3 A key strength of this study is its capacity to report on quantity of long-acting  
4 opioid prescribing across Canada over an 8-year period. However, several limitations  
5 require further discussion. First, our data include prescriptions dispensed from  
6 community pharmacies. Therefore, we are unable to determine the impact of tamper-  
7 deterrent long-acting oxycodone on opioid prescribing in hospitals. Second, we did not  
8 have patient-level data, and were thus unable to measure impacts on the number of  
9 individuals prescribed opioids in our study. This is important in the case of fentanyl  
10 where the high level of calculated population exposure may be concentrated in a  
11 relatively small number of individuals who are each receiving high opioid doses. Third,  
12 conversion of fentanyl patches into estimates of MME can be difficult given that these  
13 patches are meant to be used over 3 days, but can sometimes be used for a shorter period.  
14 In this study, we assumed that patches would be used for three days, and calculated  
15 opioid quantity (in MME) accordingly. Finally, we restricted our analyses to oral opioid  
16 formulations with reliable morphine equivalence ratios. However, these represent the vast  
17 majority of opioids prescribed across Canada, and thus we do not expect that this  
18 exclusion would influence our findings.

## 41 CONCLUSION

42  
43  
44 This large, nationally-representative study of opioid prescription patterns found  
45 that the introduction of a tamper-deterrent formulation of oxycodone, together with  
46 changes in public drug benefit policy, led to significant, sustained changes in long-acting  
47 opioid selection but only small changes in the quantity of long-acting opioids dispensed.  
48 This illustrates the limited impact a tamper-deterrent formulation and associated coverage  
49 policy can have when other non-tamper-deterrent alternatives are readily available. The  
50  
51  
52  
53  
54  
55  
56  
57  
58  
59  
60

1  
2  
3 considerable inter-provincial variation demonstrates the added influence of drug  
4 insurance policy, clinical practice, and other factors on patterns of opioid use. These  
5 findings are of high importance given the potential for patient harm when switching  
6 between opioids of differing potency, as well as the potential for patients to transition to  
7 illicit opioids when access to prescription opioids is restricted. Policy makers and public  
8 health officials should consider the potential unintended consequences of introducing  
9 tamper-deterrent opioid formulations in the absence of other patient and clinician  
10 supports, such as training for healthcare professionals on non-opioid pain management,  
11 access to treatment for opioid use disorder and access to non-drug alternatives for chronic  
12 pain management.  
13  
14  
15  
16  
17  
18  
19  
20  
21  
22  
23  
24  
25  
26  
27

### 28 **Acknowledgments**

29  
30  
31 The statements, findings, conclusions, views, and opinions contained and  
32 expressed in this publication are based in part on data obtained under license from IMS  
33 Health Canada Inc. concerning CompuScript, May 2008 through April 2016. All Rights  
34 Reserved. The statements, findings, conclusions, views, and opinions contained and  
35 expressed herein are not necessarily those of IMS Health Canada Inc. or any of its  
36 affiliated or subsidiary entities.  
37  
38  
39  
40  
41  
42  
43  
44  
45  
46  
47  
48  
49  
50  
51  
52  
53  
54  
55  
56  
57  
58  
59  
60

## REFERENCES

1. World Health Organization. Cancer Pain Relief. With a guide to opioid availability. Second Edition. ed1996.
2. Carinci AJ, Mao J. Pain and opioid addiction: what is the connection? *Curr Pain Headache Rep.* 2010;14(1):17-21.
3. Melzack R. The tragedy of needless pain. *Sci Am.* 1990;262(2):27-33.
4. Portenoy RK. Opioid therapy for chronic nonmalignant pain: a review of the critical issues. *J Pain Symptom Manage.* 1996;11(4):203-217.
5. Moulin DE, Clark AJ, Speechley M, Morley-Forster PK. Chronic pain in Canada- prevalence, treatment, impact and the role of opioid analgesia. *Pain Res Manag.* 2002;7(4):179-184.
6. Furlan AD, Sandoval JA, Mailis-Gagnon A, Tunks E. Opioids for chronic noncancer pain: a meta-analysis of effectiveness and side effects. *CMAJ.* 2006;174(11):1589-1594.
7. Gomes T, Mamdani MM, Dhalla IA, Cornish S, Paterson JM, Juurlink DN. The burden of premature opioid-related mortality. *Addiction.* 2014;109(9):1482-1488.
8. International Narcotics Control Board. Opioid Consumption Motion Chart. 2006. <https://ppsg.medicine.wisc.edu/chart>.
9. Seya MJ, Gelders SF, Achara OU, Milani B, Scholten WK. A first comparison between the consumption of and the need for opioid analgesics at country, regional, and global levels. *J Pain Palliat Care Pharmacother.* 2011;25(1):6-18.
10. Pain and Policy Study Groups. Canada Opioid Consumption in Morphine Equivalence (ME), mg per person. 2015.



- 1  
2  
3  
4  
5  
6  
7  
8  
9  
10  
11  
12  
13  
14  
15  
16  
17  
18  
19  
20  
21  
22  
23  
24  
25  
26  
27  
28  
29  
30  
31  
32  
33  
34  
35  
36  
37  
38  
39  
40  
41  
42  
43  
44  
45  
46  
47  
48  
49  
50  
51  
52  
53  
54  
55  
56  
57  
58  
59  
60
- [http://www.painpolicy.wisc.edu/sites/www.painpolicy.wisc.edu/files/country\\_file\\_s/morphine\\_equivalence/canada\\_me\\_methadone.pdf](http://www.painpolicy.wisc.edu/sites/www.painpolicy.wisc.edu/files/country_file_s/morphine_equivalence/canada_me_methadone.pdf).
11. Reitsma ML, Tranmer JE, Buchanan DM, Vandenkerkhof EG. The prevalence of chronic pain and pain-related interference in the Canadian population from 1994 to 2008. *Chronic Dis Inj Can*. 2011;31(4):157-164.
  12. Dhalla IA, Mamdani MM, Sivilotti ML, Kopp A, Qureshi O, Juurlink DN. Prescribing of opioid analgesics and related mortality before and after the introduction of long-acting oxycodone. *Cmaj*. 2009;181(12):891-896.
  13. Van Zee A. The promotion and marketing of oxycontin: commercial triumph, public health tragedy. *American journal of public health*. 2009;99(2):221-227.
  14. Lipman AG. What have we learned from OxyContin? *Journal of pain & palliative care pharmacotherapy*. 2003;17(1):1-4.
  15. Canadian Agency for Drugs and Technologies in Health. Prescribing and Dispensing Policies to Address Harms Associated With Prescription Drug Abuse 2015:103.
  16. Gomes T, Mamdani MM, Paterson JM, Dhalla IA, Juurlink DN. Trends in high-dose opioid prescribing in Canada. *Can Fam Physician*. 2014;60(9):826-832.
  17. Fischer B, Jones W, Rehm J. Trends and changes in prescription opioid analgesic dispensing in Canada 2005-2012: an update with a focus on recent interventions. *BMC Health Serv Res*. 2014;14:90.
  18. National Opioid Use Guideline Group. Canadian Guideline for Safe and Effective Use of Opioids for Chronic Non-Cancer Pain. 2010; <http://nationalpaincentre.mcmaster.ca/opioid/>. Accessed November 27, 2016.

- 1  
2  
3  
4  
5  
6  
7  
8  
9  
10  
11  
12  
13  
14  
15  
16  
17  
18  
19  
20  
21  
22  
23  
24  
25  
26  
27  
28  
29  
30  
31  
32  
33  
34  
35  
36  
37  
38  
39  
40  
41  
42  
43  
44  
45  
46  
47  
48  
49  
50  
51  
52  
53  
54  
55  
56  
57  
58  
59  
60
19. Laroche MR, Zhang F, Ross-Degnan D, Wharam JF. Rates of opioid dispensing and overdose after introduction of abuse-deterrent extended-release oxycodone and withdrawal of propoxyphene. *JAMA Intern Med.* 2015;175(6):978-987.
  20. Hwang CS, Chang HY, Alexander GC. Impact of abuse-deterrent OxyContin on prescription opioid utilization. *Pharmacoepidemiol Drug Saf.* 2015;24(2):197-204.
  21. Cicero TJ, Ellis MS, Surratt HL. Effect of abuse-deterrent formulation of OxyContin. *N Engl J Med.* 2012;367(2):187-189.
  22. Pharmaceutical Services Division. BC PharmaCare Newsletter. 2012.  
<http://www2.gov.bc.ca/assets/gov/health/health-drug-coverage/pharmacare/newsletters/news12-004.pdf>.
  23. Ontario Ministry of Health and Long-Term Care. Important Notice Regarding Change in Funding Status of Oxycodone Controlled Release Tablet – (Discontinuation of OxyContin and introduction of OxyNEO). 2012;  
[http://www.health.gov.on.ca/en/pro/programs/ohip/bulletins/4000/bul4557\\_1.pdf](http://www.health.gov.on.ca/en/pro/programs/ohip/bulletins/4000/bul4557_1.pdf).
  24. Cicero TJ, Ellis MS. Abuse-Deterrent Formulations and the Prescription Opioid Abuse Epidemic in the United States: Lessons Learned From OxyContin. *JAMA Psychiatry.* 2015;72(5):424-430.
  25. Canadian Institute for Health Information. *Hospitalizations and Emergency Department Visits Due to Opioid Poisoning in Canada.* 2016.
  26. Gomes T, Greaves S, Martins D, et al. *Latest Trends in Opioid-Related Deaths in Ontario: 1991 to 2015.* Toronto April 2017.

- 1  
2  
3 27. Smolina K, Morgan S. The drivers of overspending on prescription drugs in  
4  
5 Quebec. *Healthc Policy*. 2014;10(2):19-26.  
6  
7  
8  
9  
10  
11  
12  
13  
14  
15  
16  
17  
18  
19  
20  
21  
22  
23  
24  
25  
26  
27  
28  
29  
30  
31  
32  
33  
34  
35  
36  
37  
38  
39  
40  
41  
42  
43  
44  
45  
46  
47  
48  
49  
50  
51  
52  
53  
54  
55  
56  
57  
58  
59  
60

Confidential

Figure 1. Rate of Long-Acting Opioid Dispensing (MEQ per 1000 population), by Province, All Opioids

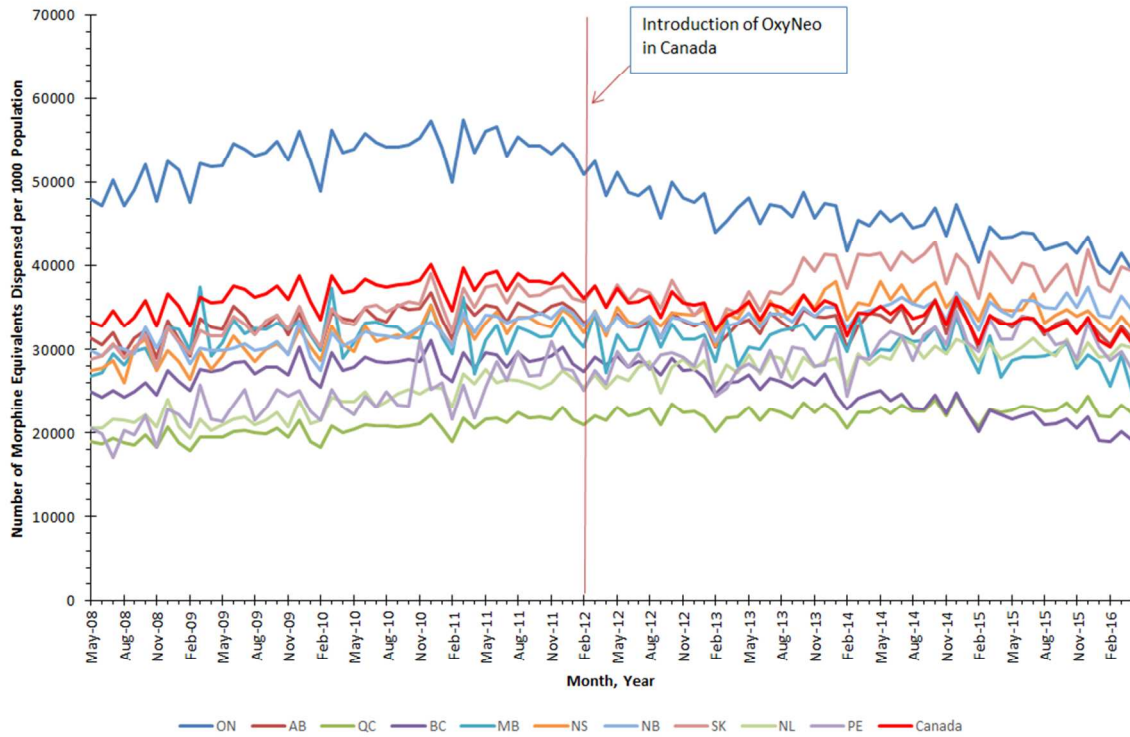

Legend. The rate of long-acting opioid dispensing by province from May 2008 to April 2016. Ontario attained the highest rate of opioid dispensing throughout the study period, and British Columbia had the lowest rate by the end of the study period.

**Figure 2. Rate of Immediate-Release Opioid Dispensing (MEQ per 1000 population), by Province, All Opioids**

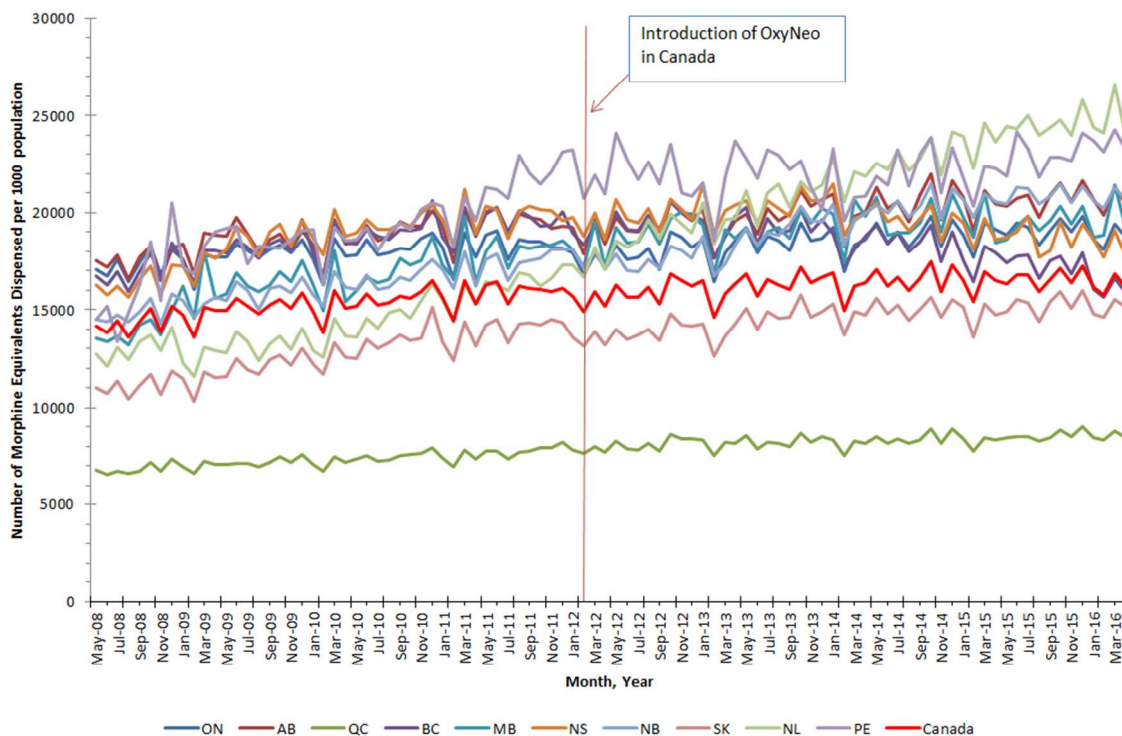

Legend. The rate of immediate-release opioid dispensing by province from May 2008 to April 2016. Newfoundland & Labrador attained the highest rate of dispensing by the end of the study period and Quebec had the lowest rate of dispensing throughout the study period.

1  
2  
3  
4  
5  
6  
7  
8  
9  
10  
11  
12  
13  
14  
15  
16  
17  
18  
19  
20  
21  
22  
23  
24  
25  
26  
27  
28  
29  
30  
31  
32  
33  
34  
35  
36  
37  
38  
39  
40  
41  
42  
43  
44  
45  
46  
47  
48  
49  
50  
51  
52  
53  
54  
55  
56  
57  
58  
59  
60

**Figure 3. National Rate of Opioid Dispensing (MEQ per 1000 population), by LA Opioid Type.**

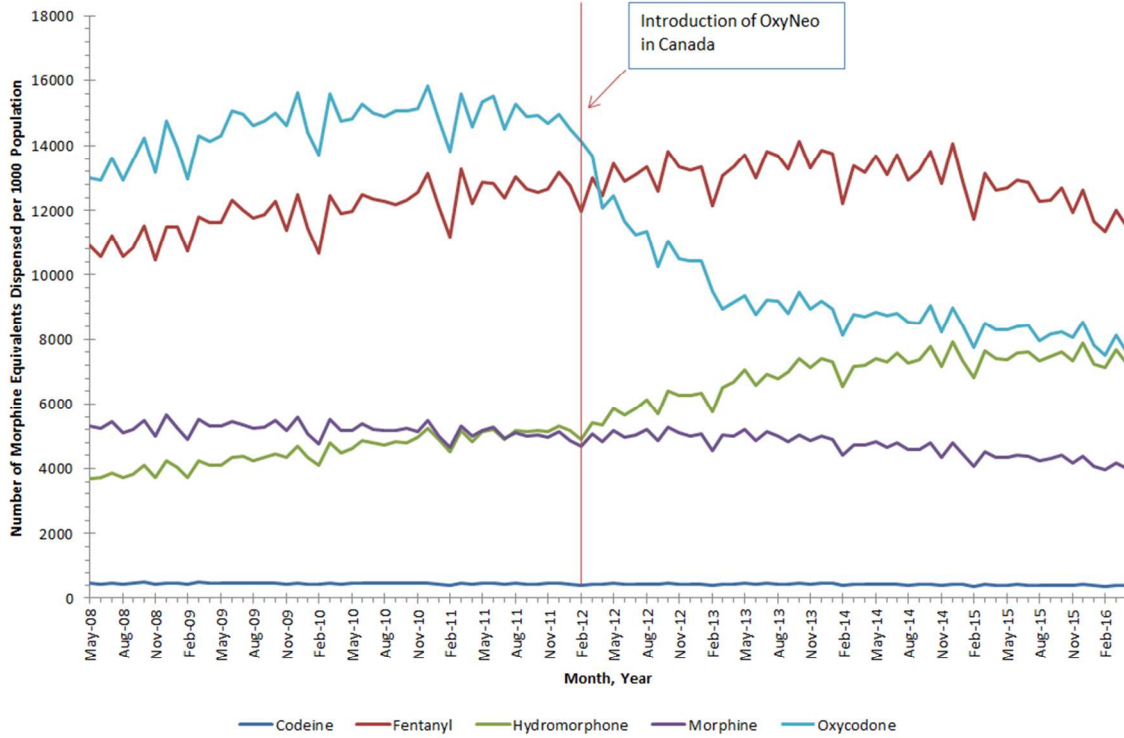

Legend. The national rates of dispensing long-acting opioids from May 2008 to April 2016. Introduction of OxyNeo in Canada in February 2012 led to significant reductions in the volume of oxycodone dispensed, and a significant increase in the volume of hydromorphone dispensed.

Table 1. Summary of long-acting opioid prescription patterns by province at the beginning and end of study period

| Province                  | May 2008 to October 2008 |                           |           |              | November 2015 to April 2016 |                           |           |              | Overall Comparisons |                 |
|---------------------------|--------------------------|---------------------------|-----------|--------------|-----------------------------|---------------------------|-----------|--------------|---------------------|-----------------|
|                           | Prescriptions            | Prescriptions per 100,000 | Units/Rx  | MME/Rx       | Prescriptions               | Prescriptions per 100,000 | Units/Rx  | MME/Rx       | % Change Rx Rate    | % Change MME/Rx |
| Ontario                   | 840,124                  | 6,334                     | 63        | 4,508        | 1,047,412                   | 7,549                     | 48        | 2,397        | 19.2                | -46.8           |
| Alberta                   | 149,800                  | 3,952                     | 71        | 4,490        | 221,583                     | 5,236                     | 58        | 3,038        | 32.5                | -32.3           |
| Quebec                    | 412,153                  | 5,147                     | 32        | 2,153        | 648,582                     | 7,819                     | 25        | 1,131        | 51.9                | -47.5           |
| British Columbia          | 206,016                  | 4,579                     | 53        | 3,162        | 258,498                     | 5,492                     | 40        | 1,672        | 19.9                | -47.1           |
| Manitoba                  | 50,867                   | 4,123                     | 59        | 4,041        | 61,860                      | 4,744                     | 50        | 2,553        | 15.1                | -36.8           |
| Nova Scotia               | 38,344                   | 4,060                     | 74        | 4,186        | 66,800                      | 7,063                     | 52        | 2,347        | 74.0                | -43.9           |
| New Brunswick             | 41,005                   | 5,427                     | 56        | 3,309        | 54,297                      | 7,194                     | 52        | 2,462        | 32.6                | -25.6           |
| Saskatchewan              | 48,198                   | 4,520                     | 56        | 3,792        | 68,742                      | 6,016                     | 53        | 2,761        | 33.1                | -27.2           |
| Newfoundland and Labrador | 18,830                   | 3,586                     | 54        | 3,473        | 32,144                      | 6,084                     | 46        | 2,515        | 69.6                | -27.6           |
| Prince Edward Island      | 5,096                    | 3,538                     | 67        | 3,261        | 7,578                       | 5,157                     | 66        | 2,750        | 45.8                | -15.7           |
| <b>Average</b>            |                          | <b>4,527</b>              | <b>59</b> | <b>3,638</b> |                             | <b>6,236</b>              | <b>49</b> | <b>2,362</b> | <b>37.8</b>         | <b>-35.1</b>    |

\*Rx signifies prescription and MME signifies mg Morphine Equivalents



Supplementary Appendix: Rate of Long-Acting Opioid Prescribing by drug and province

eFigure 1: British Columbia Rate of Opioid Dispensing (MEQ per 1000 population), by LA Opioid Type

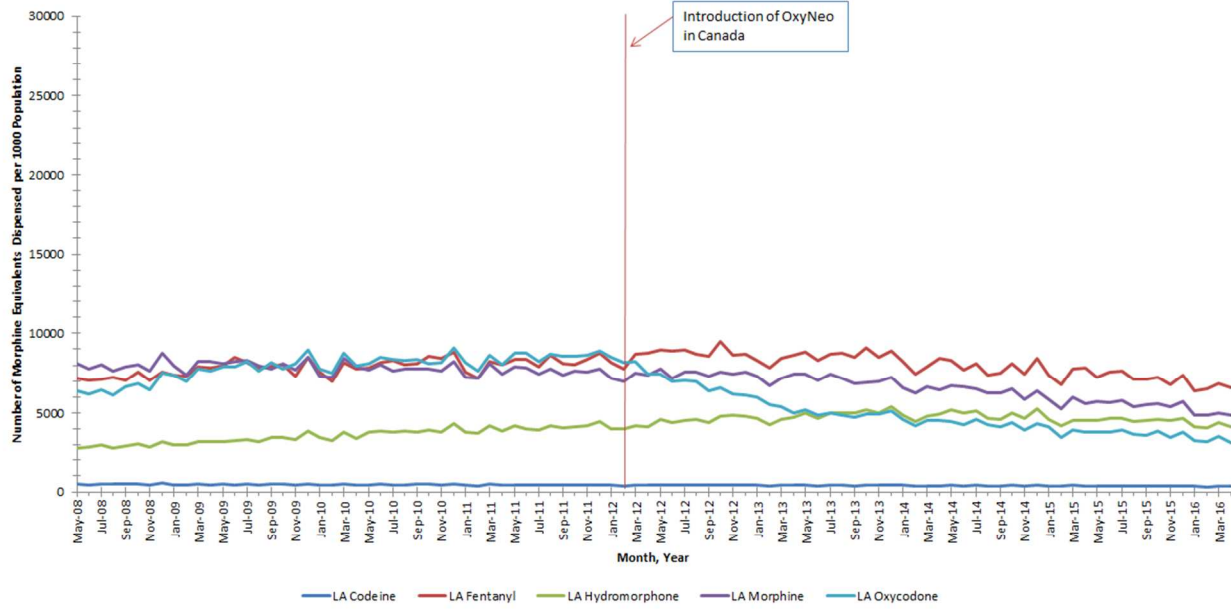

eFigure 2: Alberta Rate of Opioid Dispensing (MEQ per 1000 population), by LA Opioid Type

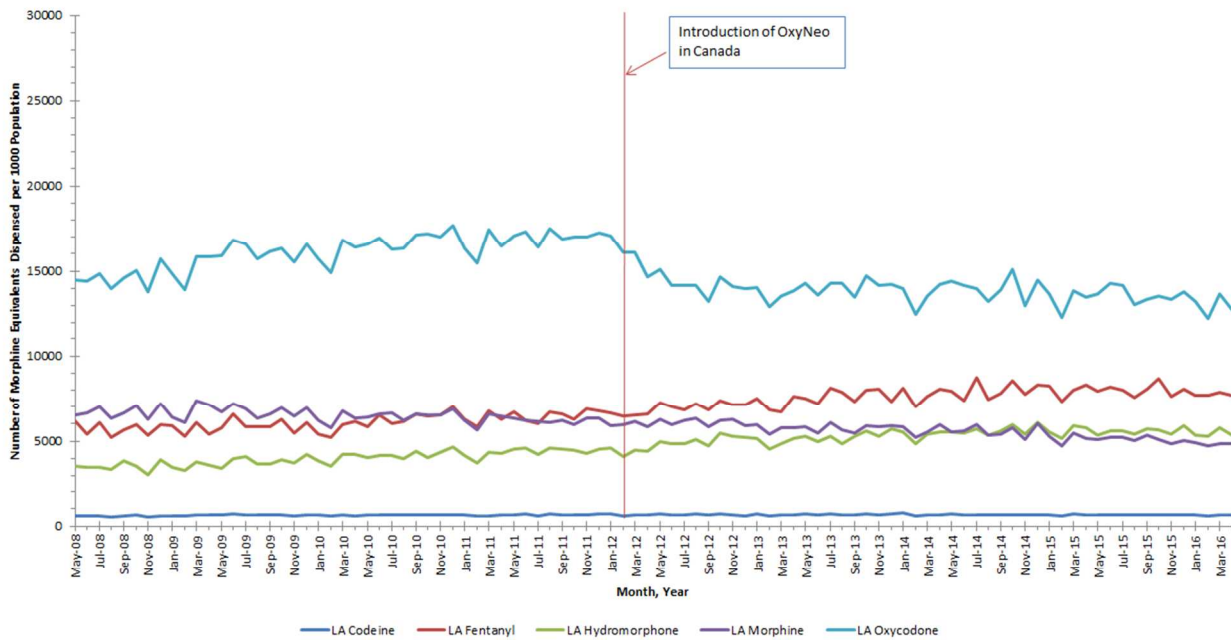



eFigure 3: Saskatchewan Rate of Opioid Dispensing (MEQ per 1000 population), by LA Opioid Type

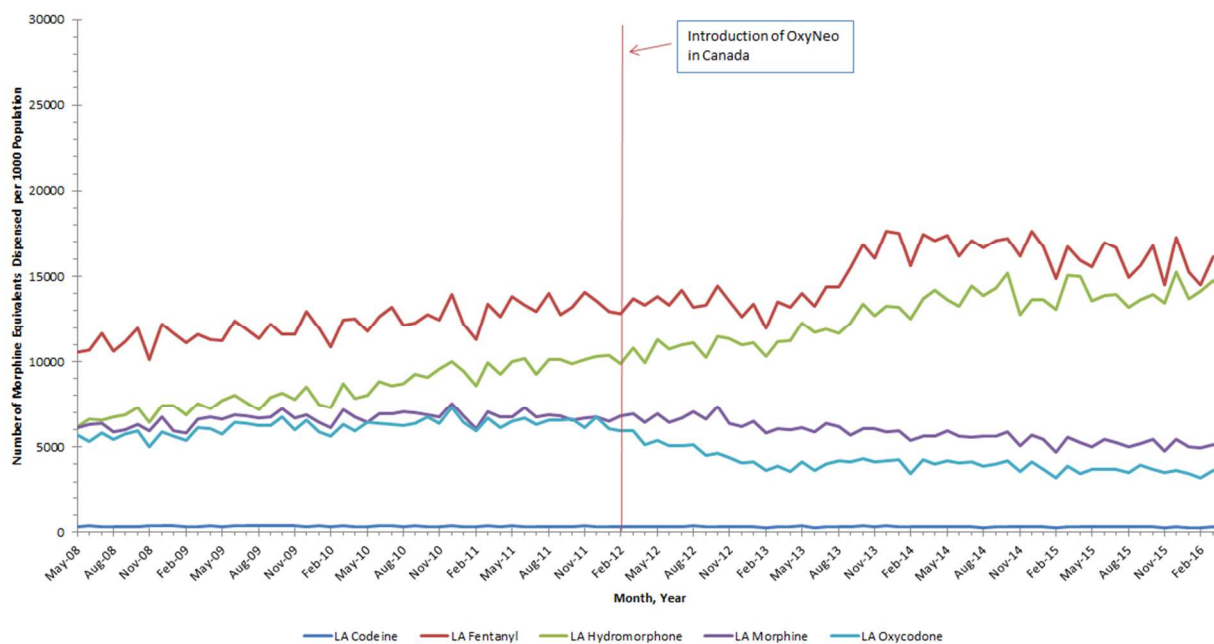

eFigure 4: Manitoba Rate of Opioid Dispensing (MEQ per 1000 population), by LA Opioid Type

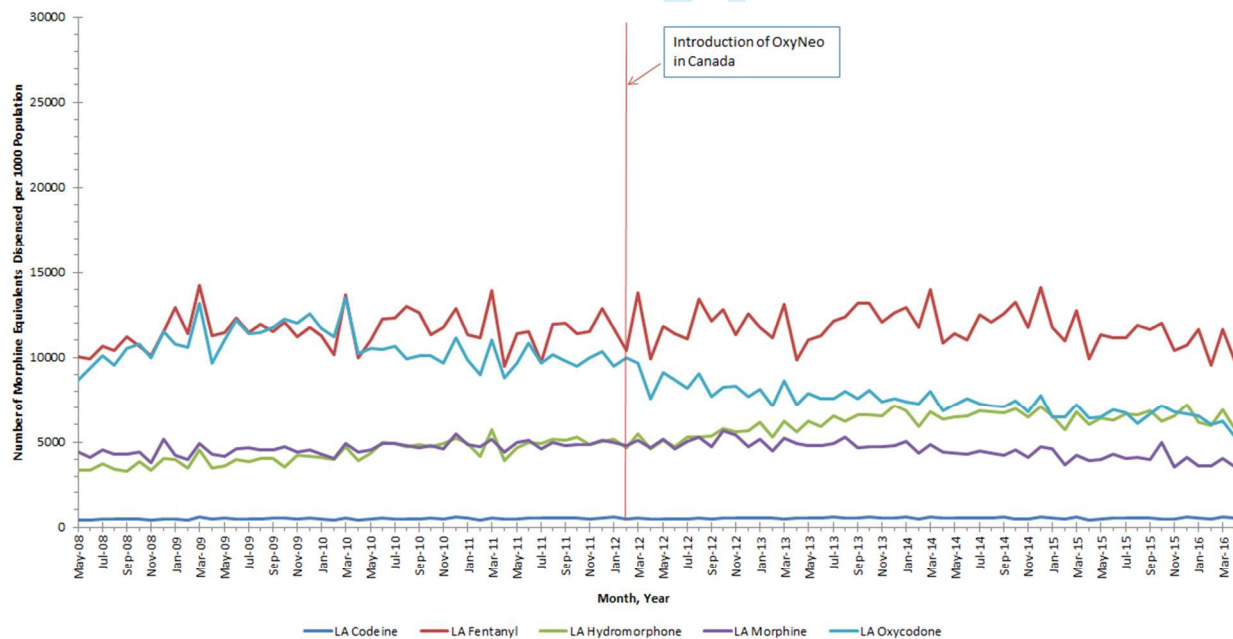

eFigure 5: Ontario Rate of Opioid Dispensing (MEQ per 1000 population), by LA Opioid Type

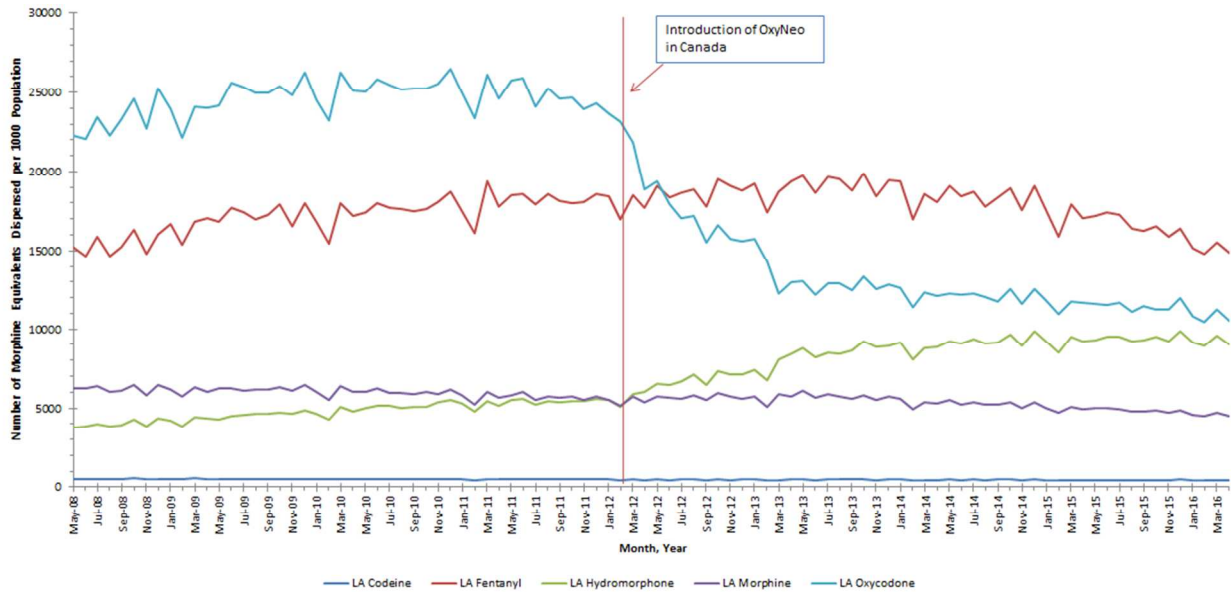

eFigure 6: Quebec Rate of Opioid Dispensing (MEQ per 1000 population), by LA Opioid Type

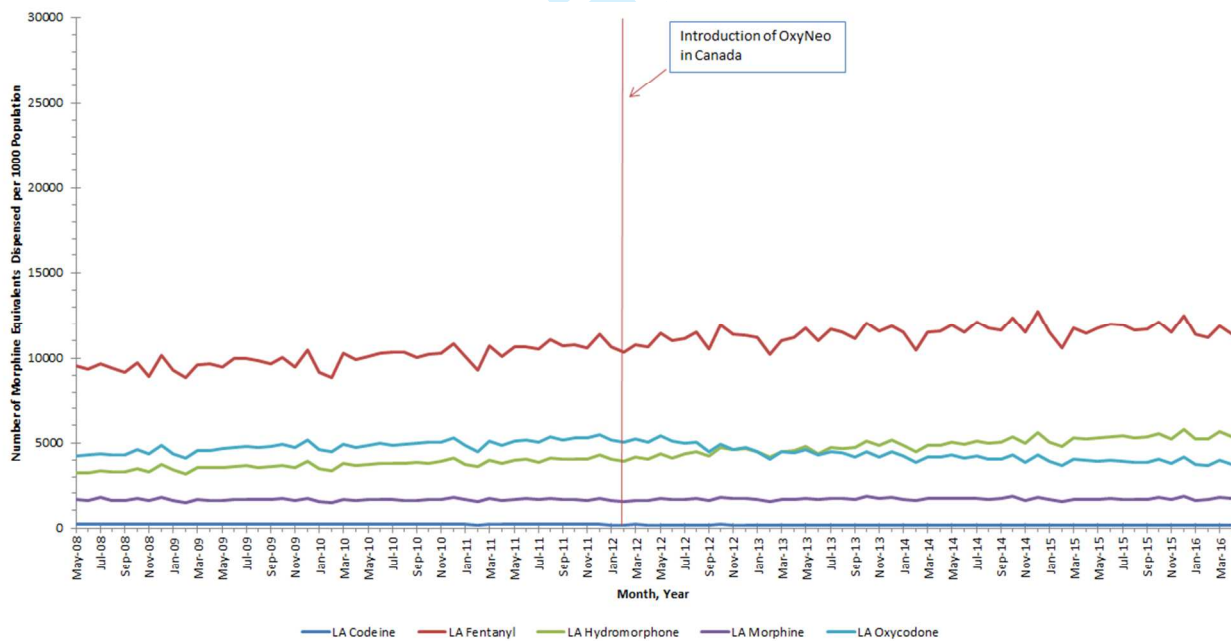

eFigure 7: New Brunswick Rate of Opioid Dispensing (MEQ per 1000 population), by LA Opioid Type

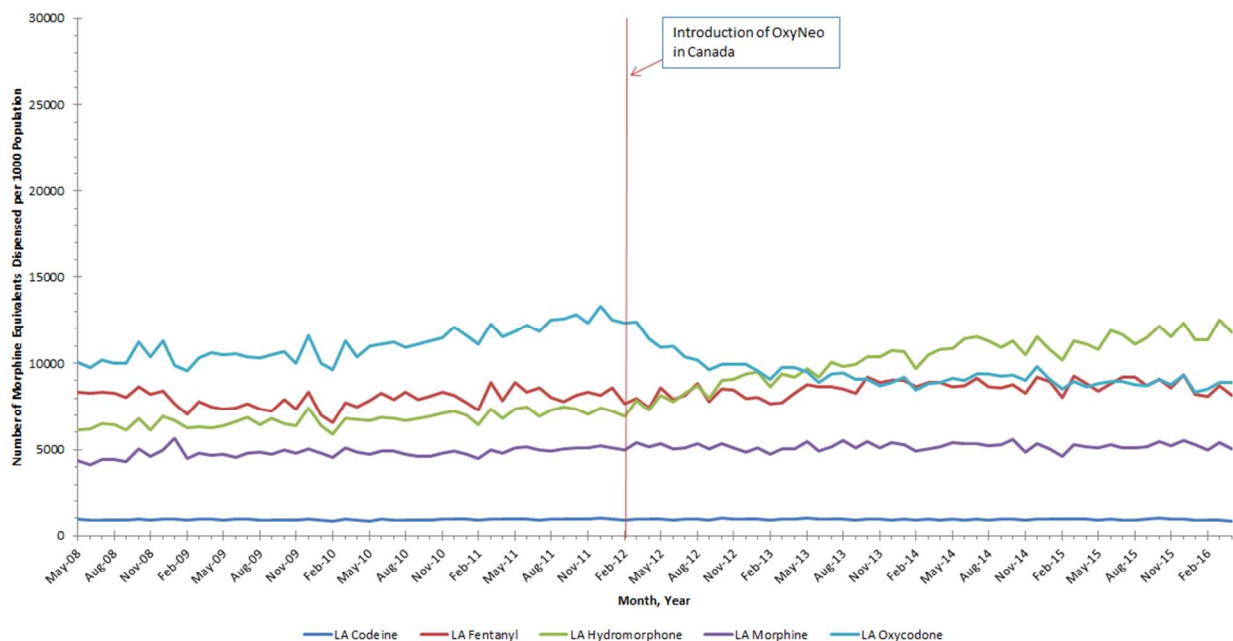

eFigure 8: Newfoundland & Labrador Rate of Opioid Dispensing (MEQ per 1000 population), by LA Opioid Type

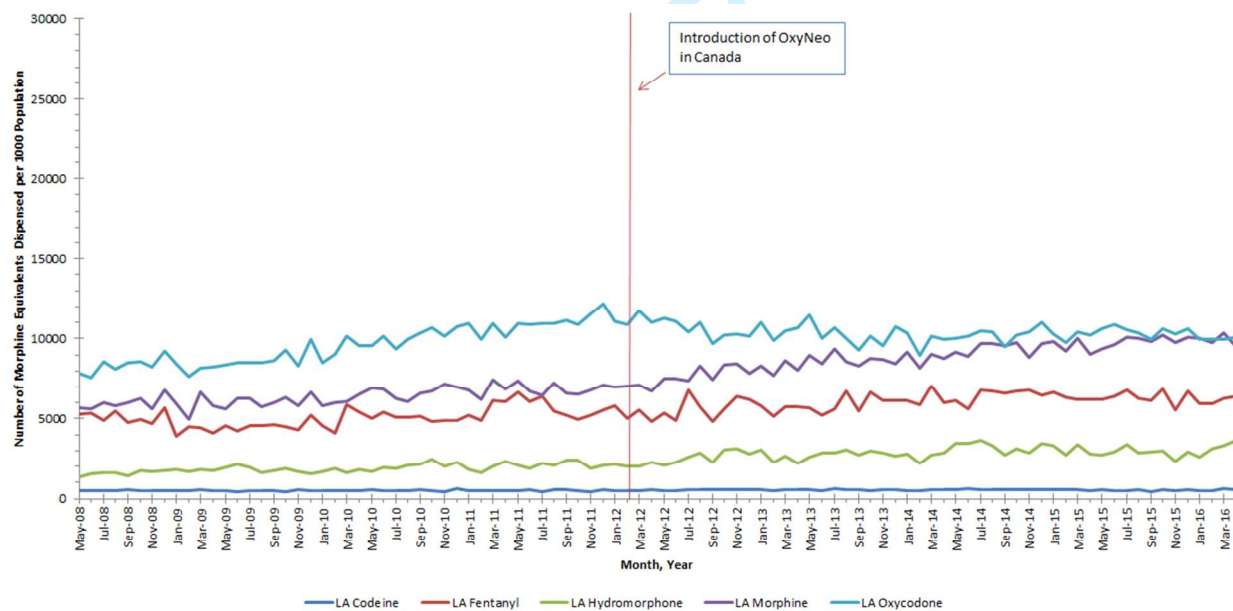

eFigure 9: Nova Scotia Rate of Opioid Dispensing (MEQ per 1000 population), by LA Opioid Type

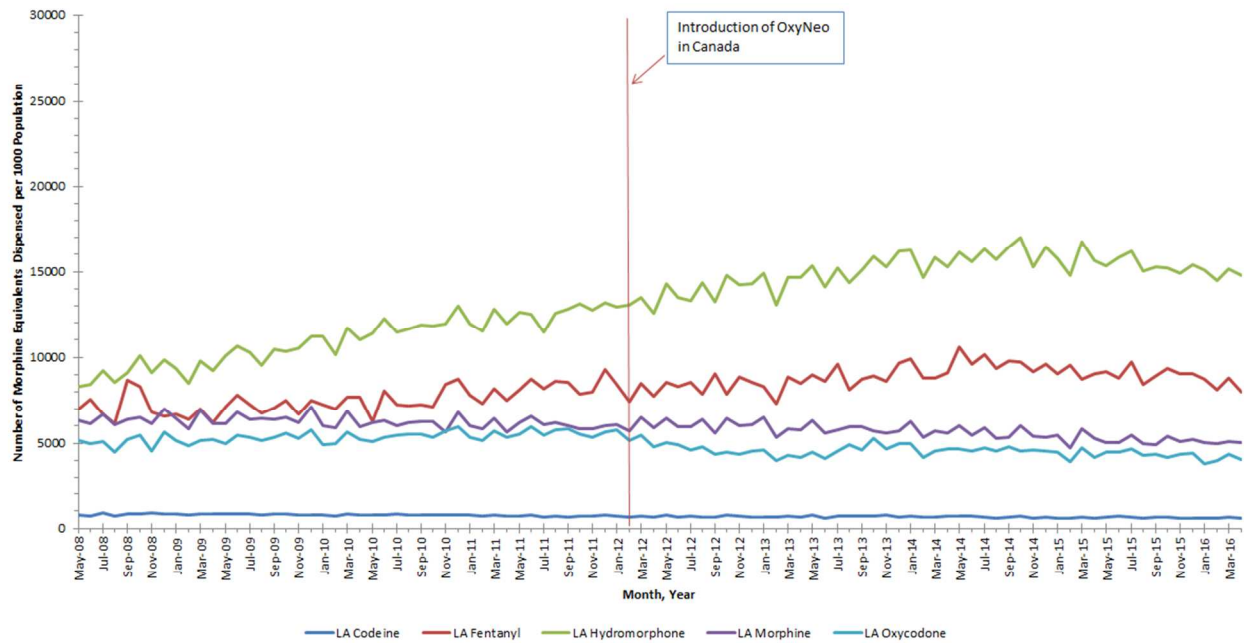

eFigure 10: Prince Edward Island Rate of Opioid Dispensing (MEQ per 1000 population), by LA Opioid Type

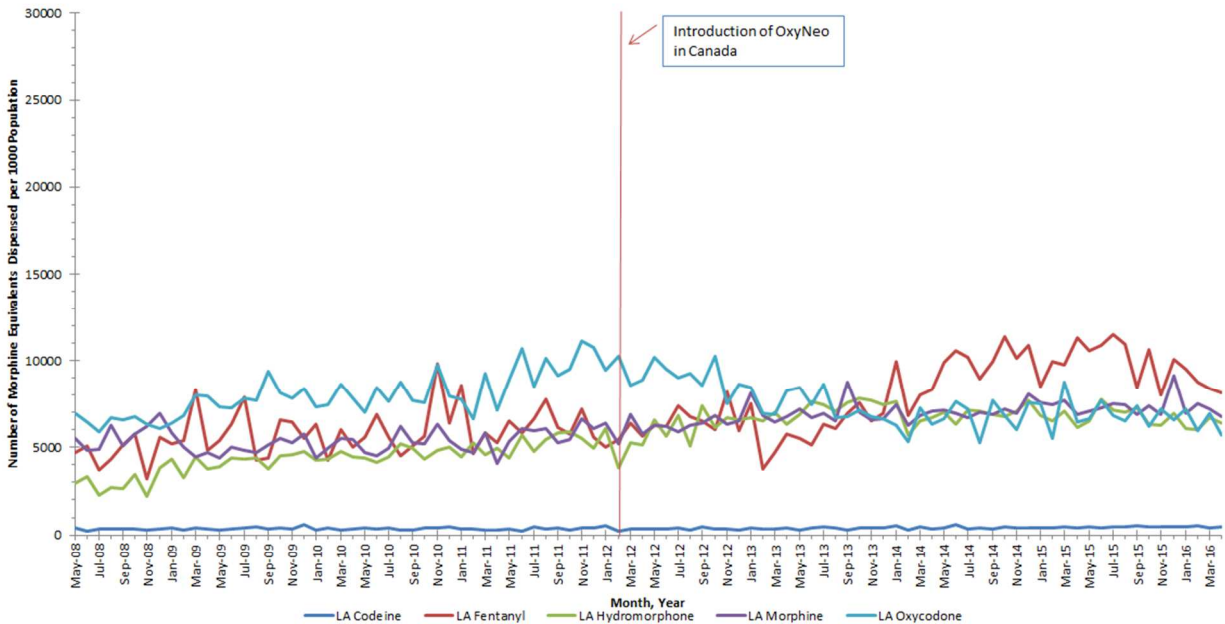

Supplement: 2017-0104_original_submission.pdf [file 2017-0104_original_submission.pdf]
